# Supplementary material for: Molecular Genetics Reveal That Silvatic Rhodnius prolixus Do Colonise Rural Houses
Source: PubMed Central journal article supplement (PMC2270345; doi:10.1371/journal.pntd.0000210), 2008-04-02
Supplement: pntd.0000210.s001.pdf [file pntd.0000210.s001.pdf]

Table S1 The pairwise comparison of 34 populations from six Venezuelan States by cytb analysis; FST values below diagonal (p-values above) (Arlequin v3.1).

|        | pop 1   | pop 2   | pop 3         | pop 4   | pop 5  | pop 6         | pop 7   | pop 8  | pop 9         | pop 10        | pop 11        | pop 12        | pop 13        | pop 14        | pop 15        | pop 16        | pop 17        | pop 18        | pop 19        | pop 20        | pop 21        | pop 22        | pop 23        | pop 24        | pop 25        | pop 26        | pop 27        | pop 28        | pop 29        | pop 30        | pop 31        | pop 32        | pop 33        | pop 34        |               |               |               |               |               |
|--------|---------|---------|---------------|---------|--------|---------------|---------|--------|---------------|---------------|---------------|---------------|---------------|---------------|---------------|---------------|---------------|---------------|---------------|---------------|---------------|---------------|---------------|---------------|---------------|---------------|---------------|---------------|---------------|---------------|---------------|---------------|---------------|---------------|---------------|---------------|---------------|---------------|---------------|
| pop 1  |         | 0.0216  | <b>0.0000</b> | 0.7144  | 0.0002 | <b>0.0000</b> | 0.0005  | 0.2421 | <b>0.0000</b> | <b>0.0000</b> | 0.0002        | 0.0003        | 0.0703        | 0.0023        | 0.0005        | 0.0010        | 0.0023        | <b>0.0000</b> | 0.0100        | <b>0.0001</b> | 0.0005        | 0.0025        | 0.0005        | 0.0025        | <b>0.0000</b> | <b>0.0000</b> | 0.0055        | 0.0005        | <b>0.0000</b> | <b>0.0000</b> | <b>0.0000</b> | <b>0.0000</b> | <b>0.0000</b> | <b>0.0000</b> | <b>0.0000</b> |               |               |               |               |
| pop 2  | 0.1828  |         | 0.1428        | 0.1837  | 0.2587 | 0.0031        | 0.0840  | 0.9999 | 0.0006        | 0.0073        | 0.0321        | 0.0796        | 0.0002        | 0.1505        | 0.0828        | 0.0693        | 0.0756        | 0.0174        | 0.2950        | 0.0337        | 0.0398        | 0.1142        | 0.0741        | 0.0847        | 0.0441        | 0.0060        | 0.1540        | 0.0749        | <b>0.0000</b> | <b>0.0000</b> | <b>0.0000</b> | <b>0.0000</b> | <b>0.0000</b> | <b>0.0000</b> | <b>0.0000</b> | <b>0.0000</b> |               |               |               |
| pop 3  | 0.4268  | 0.0470  |               | 0.0061  | 0.7674 | <b>0.0000</b> | 0.0688  | 0.2597 | 0.1846        | 0.0188        | 0.0113        | 0.2092        | <b>0.0000</b> | 0.5075        | 0.3551        | 0.1448        | 0.3451        | 0.0785        | 0.5184        | 0.3103        | 0.2686        | 0.2452        | 0.2046        | 0.3445        | 0.0971        | 0.0151        | 0.5708        | 0.3352        | 0.0506        | 0.3749        | 0.0526        | 0.0194        | <b>0.0010</b> | <b>0.0001</b> | <b>0.0001</b> | <b>0.0001</b> | <b>0.0001</b> |               |               |
| pop 4  | -0.0343 | 0.0593  | 0.3020        |         | 0.0158 | <b>0.0000</b> | 0.0063  | 0.6830 | <b>0.0000</b> | 0.0003        | 0.0016        | 0.0061        | 0.0489        | 0.0176        | 0.0122        | 0.0077        | 0.0175        | 0.0008        | 0.0475        | 0.0019        | 0.0031        | 0.0176        | 0.0080        | 0.0165        | 0.0029        | 0.0029        | 0.0410        | 0.0060        | 0.0002        | 0.0018        | 0.0002        | <b>0.0001</b> | <b>0.0000</b> | <b>0.0000</b> | <b>0.0000</b> | <b>0.0000</b> | <b>0.0000</b> |               |               |
| pop 5  | 0.3665  | 0.0130  | -0.0238       | 0.2361  |        | 0.0352        | 0.1755  | 0.2205 | 0.0139        | 0.0311        | 0.1300        | 0.1828        | <b>0.0000</b> | 0.3314        | 0.1920        | 0.1954        | 0.3170        | 0.0477        | 0.5656        | 0.1739        | 0.1685        | 0.0880        | 0.2701        | 0.3111        | 0.0337        | 0.0313        | 0.3742        | 0.3136        | 0.0357        | 0.2833        | 0.0347        | 0.0085        | 0.0081        | 0.0002        | <b>0.0000</b> | <b>0.0000</b> | <b>0.0000</b> | <b>0.0000</b> |               |
| pop 6  | 0.6617  | 0.2766  | 0.0968        | 0.6025  | 0.1324 |               | 0.5542  | 0.0082 | 0.1831        | <b>0.0000</b> | 0.0601        | <b>0.0000</b> | 0.5509        | 0.0999        | 0.0013        | 0.0313        | 0.6640        | 0.0141        | 0.9999        | 0.4347        | 0.2502        | 0.0596        | 0.0984        | 0.6605        | 0.0362        | <b>0.0000</b> | 0.9999        | 0.5621        | 0.4805        | 0.4894        | 0.2222        | <b>0.0001</b> | <b>0.0000</b> | <b>0.0000</b> | <b>0.0000</b> | <b>0.0000</b> | <b>0.0000</b> |               |               |
| pop 7  | 0.5813  | 0.2035  | 0.0522        | 0.4903  | 0.0820 | -0.0046       |         | 0.0837 | 0.9999        | 0.0007        | 0.2201        | 0.9999        | <b>0.0000</b> | 0.9999        | 0.0477        | 0.0347        | 0.1827        | 0.0340        | 0.9999        | 0.4795        | 0.9999        | 0.1639        | 0.0867        | 0.1839        | 0.4709        | <b>0.0000</b> | 0.3833        | 0.2066        | 0.9999        | 0.5714        | 0.9999        | <b>0.0010</b> | <b>0.0000</b> | <b>0.0000</b> | <b>0.0003</b> | <b>0.0000</b> | <b>0.0000</b> |               |               |
| pop 8  | 0.0854  | -0.0630 | 0.0959        | -0.0312 | 0.0414 | 0.4704        | 0.3333  |        | 0.0024        | 0.0037        | 0.0265        | 0.0874        | 0.0112        | 0.1019        | 0.1000        | 0.0865        | 0.0936        | 0.0157        | 0.2275        | 0.0304        | 0.0350        | 0.1019        | 0.0864        | 0.0928        | 0.0431        | <b>0.0000</b> | 0.2319        | 0.0921        | 0.0061        | 0.0453        | 0.0045        | 0.0033        | 0.0012        | 0.0011        | <b>0.0000</b> | <b>0.0000</b> | <b>0.0000</b> | <b>0.0000</b> |               |
| pop 9  | 0.7012  | 0.3171  | 0.1212        | 0.6551  | 0.1596 | 0.0666        | 0.0000  | 0.5383 |               | <b>0.0000</b> | 0.0039        | 0.9999        | <b>0.0000</b> | 0.9999        | 0.0003        | 0.0018        | 0.0445        | <b>0.0000</b> | 0.9999        | 0.0773        | 0.2725        | 0.0318        | 0.0101        | 0.0470        | 0.0142        | <b>0.0000</b> | 0.1696        | 0.0496        | 0.9999        | 0.2026        | 0.9999        | <b>0.0000</b> | <b>0.0000</b> | <b>0.0000</b> | <b>0.0000</b> | <b>0.0000</b> | <b>0.0000</b> |               |               |
| pop 10 | 0.6219  | 0.2518  | 0.1210        | 0.5506  | 0.1406 | 0.5297        | 0.6276  | 0.4126 | 0.7537        |               | <b>0.0000</b> | 0.0007        | <b>0.0000</b> | 0.0043        | <b>0.0000</b> | <b>0.0001</b> | 0.0008        | <b>0.0000</b> | 0.0061        | <b>0.0000</b> | 0.0003        | 0.0002        | <b>0.0000</b> | 0.0005        | <b>0.0001</b> | <b>0.0000</b> | 0.0024        | <b>0.0001</b> | <b>0.0000</b> | 0.0004        | <b>0.0000</b> | <b>0.0000</b> | <b>0.0000</b> | <b>0.0000</b> | <b>0.0000</b> | <b>0.0000</b> | <b>0.0000</b> |               |               |
| pop 11 | 0.5848  | 0.2102  | 0.0626        | 0.4961  | 0.0909 | 0.0976        | 0.0574  | 0.3389 | 0.1927        | 0.4351        |               | <b>0.0000</b> | 0.4440        | 0.1962        | 0.1347        | 0.9035        | 0.1756        | 0.6798        | 0.3901        | 0.5859        | 0.9999        | 0.8172        | 0.9028        | 0.0669        | <b>0.0000</b> | <b>0.0000</b> | 0.7108        | 0.2861        | 0.0104        | 0.1240        | 0.0073        | 0.0005        | <b>0.0000</b> | <b>0.0000</b> | <b>0.0000</b> | <b>0.0000</b> | <b>0.0000</b> | <b>0.0000</b> |               |
| pop 12 | 0.5813  | 0.2035  | 0.0522        | 0.4903  | 0.0820 | -0.0046       | 0.0000  | 0.3333 | 0.0000        | 0.6276        | 0.0574        |               | 0.0002        | 0.9999        | 0.0516        | 0.0335        | 0.1793        | 0.0363        | 0.9999        | 0.4823        | 0.9999        | 0.1508        | 0.0855        | 0.1857        | 0.4782        | <b>0.0001</b> | 0.3718        | 0.2101        | 0.9999        | 0.5841        | 0.9999        | 0.0013        | <b>0.0000</b> | <b>0.0000</b> | <b>0.0000</b> | <b>0.0001</b> | <b>0.0001</b> |               |               |
| pop 13 | 0.1971  | 0.5511  | 0.7536        | 0.3349  | 0.7053 | 0.9958        | 1.0000  | 0.5556 | 1.0000        | 0.9900        | 0.9798        | 1.0000        |               | <b>0.0000</b> | <b>0.0000</b> | <b>0.0000</b> | <b>0.0000</b> | <b>0.0000</b> | <b>0.0000</b> | <b>0.0000</b> | <b>0.0000</b> | <b>0.0000</b> | <b>0.0000</b> | <b>0.0000</b> | <b>0.0000</b> | <b>0.0000</b> | <b>0.0000</b> | <b>0.0000</b> | <b>0.0000</b> | <b>0.0000</b> | <b>0.0000</b> | <b>0.0000</b> | <b>0.0000</b> | <b>0.0000</b> | <b>0.0000</b> | <b>0.0000</b> | <b>0.0000</b> | <b>0.0000</b> |               |
| pop 14 | 0.5497  | 0.1711  | 0.0251        | 0.4437  | 0.0541 | -0.0339       | 0.0000  | 0.2746 | 0.0000        | 0.5922        | 0.0163        | 0.0000        | 1.0000        |               | 0.4075        | 0.0886        | 0.9999        | 0.1013        | 0.9999        | 0.5077        | 0.9999        | 0.4652        | 0.2133        | 0.9999        | 0.4850        | <b>0.0001</b> | 0.4608        | 0.4805        | 0.9999        | 0.9999        | 0.9999        | 0.0058        | <b>0.0000</b> | <b>0.0000</b> | <b>0.0000</b> | <b>0.0000</b> | <b>0.0000</b> | <b>0.0000</b> |               |
| pop 15 | 0.4815  | 0.1053  | -0.0034       | 0.3648  | 0.0137 | 0.1289        | 0.0671  | 0.1770 | 0.1999        | 0.2165        | 0.0129        | 0.0671        | 0.8846        | 0.0269        |               | 0.6174        | 0.4948        | 0.2358        | 0.4151        | 0.0440        | 0.0524        | 0.4669        | 0.6475        | 0.5048        | 0.0244        | <b>0.0000</b> | 0.4224        | 0.3415        | 0.0010        | 0.5445        | 0.0005        | 0.0050        | <b>0.0001</b> | <b>0.0001</b> | <b>0.0001</b> | <b>0.0001</b> | <b>0.0001</b> | <b>0.0001</b> |               |
| pop 16 | 0.5565  | 0.1826  | 0.0458        | 0.4569  | 0.0729 | 0.2457        | 0.3187  | 0.2931 | 0.5330        | 0.5444        | 0.0760        | 0.3187        | 0.9872        | 0.2566        | -0.0183       |               | 0.2913        | 0.9999        | 0.2192        | 0.3200        | 0.0265        | 0.0604        | 0.6930        | 0.2934        | 0.0147        | <b>0.0001</b> | 0.5730        | 0.6140        | 0.0038        | 0.0705        | 0.0023        | 0.3441        | <b>0.0000</b> | <b>0.0000</b> | <b>0.0000</b> | <b>0.0000</b> | <b>0.0000</b> |               |               |
| pop 17 | 0.5534  | 0.1754  | 0.0298        | 0.4504  | 0.0589 | -0.0197       | 0.0295  | 0.2829 | 0.1888        | 0.5149        | -0.0631       | 0.0295        | 0.9924        | -0.0182       | -0.0107       | 0.0382        |               | 0.3709        | 0.9999        | 0.8229        | 0.7058        | 0.4894        | 0.9999        | 0.9999        | 0.3234        | <b>0.0001</b> | 0.9999        | 0.7892        | 0.0650        | 0.7753        | 0.0559        | 0.0246        | <b>0.0001</b> | <b>0.0002</b> | <b>0.0001</b> | <b>0.0002</b> | <b>0.0001</b> | <b>0.0002</b> |               |
| pop 18 | 0.6031  | 0.2256  | 0.0750        | 0.5228  | 0.1046 | 0.1659        | 0.2007  | 0.3715 | 0.3590        | 0.4948        | 0.0534        | 0.2007        | 0.9810        | 0.1568        | 0.0147        | -0.0879       | 0.0091        |               | 0.2987        | 0.1566        | 0.0410        | 0.1394        | 0.6371        | 0.3600        | 0.0143        | <b>0.0000</b> | 0.5331        | 0.4630        | <b>0.0001</b> | 0.1467        | <b>0.0000</b> | 0.1312        | <b>0.0000</b> | <b>0.0000</b> | <b>0.0000</b> | <b>0.0000</b> | <b>0.0000</b> | <b>0.0000</b> |               |
| pop 19 | 0.5226  | 0.1374  | -0.0061       | 0.4026  | 0.0210 | -0.0706       | 0.0000  | 0.2208 | 0.0000        | 0.5619        | -0.0280       | 0.0000        | 1.0000        | 0.0000        | -0.0165       | 0.1995        | -0.0687       | 0.1138        |               | 0.7769        | 0.9999        | 0.4727        | 0.4136        | 0.9999        | 0.6774        | <b>0.0001</b> | 0.9999        | 0.5046        | 0.9999        | 0.9999        | 0.9999        | 0.9999        | 0.0417        | 0.0032        | 0.0022        | <b>0.0000</b> | <b>0.0000</b> | <b>0.0000</b> |               |
| pop 20 | 0.5908  | 0.2122  | 0.0585        | 0.5045  | 0.0892 | -0.0186       | 0.0410  | 0.3496 | 0.1689        | 0.5252        | 0.0408        | 0.0410        | 0.9911        | 0.0012        | 0.0494        | 0.0599        | -0.0567       | 0.0413        | -0.0426       |               | 0.3590        | 0.1324        | 0.3995        | 0.8199        | 0.1247        | <b>0.0000</b> | 0.9999        | 0.9999        | 0.9999        | 0.1141        | 0.3382        | 0.1025        | 0.0106        | <b>0.0000</b> | <b>0.0000</b> | <b>0.0000</b> | <b>0.0000</b> | <b>0.0000</b> | <b>0.0000</b> |
| pop 21 | 0.5878  | 0.2097  | 0.0571        | 0.4998  | 0.0669 | 0.0251        | -0.0092 | 0.3447 | 0.0991        | 0.5848        | -0.0055       | -0.0092       | 0.9967        | -0.0462       | 0.0539        | 0.2549        | -0.0574       | 0.1661        | -0.0891       | 0.0404        |               | 0.4288        | 0.3155        | 0.6948        | 0.1452        | <b>0.0000</b> | 0.6007        | 0.1830        | 0.3378        | 0.5522        | 0.3117        | 0.0006        | <b>0.0000</b> | <b>0.0000</b> | <b>0.0000</b> | <b>0.0000</b> | <b>0.0000</b> | <b>0.0000</b> |               |
| pop 22 | 0.5435  | 0.1688  | 0.0310        | 0.4355  | 0.0572 | 0.2118        | 0.1759  | 0.2655 | 0.4013        | 0.5085        | -0.0947       | 0.1759        | 0.9895        | 0.1111        | -0.0179       | 0.1634        | -0.0355       | 0.1042        | 0.0492        | 0.1116        | 0.0284        |               | 0.5939        | 0.4984        | 0.1029        | <b>0.0000</b> | 0.3314        | 0.0854        | 0.0515        | 0.4398        | 0.0476        | 0.0017        | 0.0026        | 0.0003        | <b>0.0000</b> | <b>0.0000</b> | <b>0.0000</b> | <b>0.0000</b> |               |
| pop 23 | 0.5574  | 0.1824  | 0.0408        | 0.4573  | 0.0687 | 0.1060        | 0.1155  | 0.2920 | 0.2993        | 0.4698        | -0.0485       | 0.1155        | 0.9837        | 0.0632        | -0.0265       | -0.0286       | -0.0838       | -0.0294       | 0.0110        | 0.0063        | 0.0419        | -0.0320       |               | 0.9999        | 0.0431        | <b>0.0000</b> | 0.7756        | 0.7891        | 0.0209        | 0.0844        | 0.0148        | 0.0246        | <b>0.0000</b> | <b>0.0000</b> | <b>0.0000</b> | <b>0.0000</b> | <b>0.0000</b> | <b>0.0000</b> |               |
| pop 24 | 0.5534  | 0.1754  | 0.0298        | 0.4504  | 0.0589 | -0.0197       | 0.0295  | 0.2829 | 0.1888        | 0.5149        | -0.0631       | 0.0295        | 0.9924        | -0.0182       | -0.0107       | 0.0382        | -0.1429       | 0.0091        | -0.0567       | -0.0574       | -0.0355       | -0.0838       |               | 0.9999        | 0.0431        | <b>0.0000</b> | 0.7756        | 0.7891        | 0.0209        | 0.0844        | 0.0148        | 0.0246        | <b>0.0000</b> | <b>0.0000</b> | <b>0.0000</b> | <b>0.0000</b> | <b>0.0000</b> | <b>0.0000</b> |               |
| pop 25 | 0.5777  | 0.2038  | 0.0572        | 0.4850  | 0.0    |               |         |        |               |               |               |               |               |               |               |               |               |               |               |               |               |               |               |               |               |               |               |               |               |               |               |               |               |               |               |               |               |               |               |

Table S1 The standard deviation of P values (Arlequin v3.1).

|        | pop 1 | pop 2   | pop 3   | pop 4   | pop 5   | pop 6   | pop 7   | pop 8   | pop 9   | pop 10  | pop 11  | pop 12  | pop 13  | pop 14  | pop 15  | pop 16  | pop 17  | pop 18  | pop 19  | pop 20  | pop 21  | pop 22  | pop 23  | pop 24  | pop 25  | pop 26  | pop 27  | pop 28  | pop 29  | pop 30  | pop 31  | pop 32  | pop 33  | pop 34  |         |         |
|--------|-------|---------|---------|---------|---------|---------|---------|---------|---------|---------|---------|---------|---------|---------|---------|---------|---------|---------|---------|---------|---------|---------|---------|---------|---------|---------|---------|---------|---------|---------|---------|---------|---------|---------|---------|---------|
| pop 1  |       | ±0.0014 | ±0.0000 | ±0.0047 | ±0.0001 | ±0.0000 | ±0.0002 | ±0.0040 | ±0.0000 | ±0.0000 | ±0.0001 | ±0.0002 | ±0.0025 | ±0.0005 | ±0.0003 | ±0.0005 | ±0.0000 | ±0.0010 | ±0.0001 | ±0.0002 | ±0.0005 | ±0.0003 | ±0.0005 | ±0.0000 | ±0.0000 | ±0.0008 | ±0.0002 | ±0.0000 | ±0.0000 | ±0.0000 | ±0.0000 | ±0.0000 | ±0.0000 | ±0.0000 | ±0.0000 |         |
| pop 2  |       |         | ±0.0035 | ±0.0036 | ±0.0049 | ±0.0005 | ±0.0025 | ±0.0000 | ±0.0002 | ±0.0009 | ±0.0017 | ±0.0032 | ±0.0001 | ±0.0036 | ±0.0025 | ±0.0028 | ±0.0025 | ±0.0014 | ±0.0043 | ±0.0020 | ±0.0018 | ±0.0029 | ±0.0025 | ±0.0028 | ±0.0018 | ±0.0007 | ±0.0034 | ±0.0025 | ±0.0004 | ±0.0019 | ±0.0004 | ±0.0007 | ±0.0001 | ±0.0007 | ±0.0005 |         |
| pop 3  |       |         |         | ±0.0008 | ±0.0040 | ±0.0024 | ±0.0041 | ±0.0037 | ±0.0013 | ±0.0010 | ±0.0044 | ±0.0043 | ±0.0000 | ±0.0053 | ±0.0049 | ±0.0035 | ±0.0057 | ±0.0024 | ±0.0052 | ±0.0046 | ±0.0043 | ±0.0044 | ±0.0038 | ±0.0044 | ±0.0027 | ±0.0011 | ±0.0050 | ±0.0047 | ±0.0021 | ±0.0049 | ±0.0025 | ±0.0014 | ±0.0004 | ±0.0001 | ±0.0001 |         |
| pop 4  |       |         |         |         | ±0.0012 | ±0.0000 | ±0.0008 | ±0.0047 | ±0.0000 | ±0.0002 | ±0.0004 | ±0.0008 | ±0.0018 | ±0.0012 | ±0.0011 | ±0.0008 | ±0.0013 | ±0.0003 | ±0.0019 | ±0.0004 | ±0.0006 | ±0.0015 | ±0.0010 | ±0.0013 | ±0.0006 | ±0.0006 | ±0.0020 | ±0.0007 | ±0.0001 | ±0.0004 | ±0.0001 | ±0.0001 | ±0.0001 | ±0.0001 | ±0.0001 |         |
| pop 5  |       |         |         |         |         | ±0.0012 | ±0.0000 | ±0.0008 | ±0.0047 | ±0.0000 | ±0.0002 | ±0.0004 | ±0.0008 | ±0.0018 | ±0.0012 | ±0.0011 | ±0.0008 | ±0.0013 | ±0.0003 | ±0.0019 | ±0.0004 | ±0.0006 | ±0.0015 | ±0.0010 | ±0.0013 | ±0.0006 | ±0.0006 | ±0.0020 | ±0.0007 | ±0.0001 | ±0.0004 | ±0.0001 | ±0.0001 | ±0.0001 | ±0.0001 |         |
| pop 6  |       |         |         |         |         |         | ±0.0018 | ±0.0039 | ±0.0039 | ±0.0012 | ±0.0016 | ±0.0031 | ±0.0039 | ±0.0000 | ±0.0048 | ±0.0036 | ±0.0040 | ±0.0046 | ±0.0022 | ±0.0048 | ±0.0037 | ±0.0036 | ±0.0023 | ±0.0045 | ±0.0047 | ±0.0020 | ±0.0019 | ±0.0041 | ±0.0042 | ±0.0019 | ±0.0043 | ±0.0017 | ±0.0010 | ±0.0009 | ±0.0001 |         |
| pop 7  |       |         |         |         |         |         |         | ±0.0056 | ±0.0009 | ±0.0037 | ±0.0000 | ±0.0023 | ±0.0052 | ±0.0000 | ±0.0000 | ±0.0003 | ±0.0019 | ±0.0045 | ±0.0013 | ±0.0000 | ±0.0049 | ±0.0046 | ±0.0025 | ±0.0031 | ±0.0046 | ±0.0019 | ±0.0000 | ±0.0049 | ±0.0054 | ±0.0051 | ±0.0043 | ±0.0001 | ±0.0001 | ±0.0001 | ±0.0001 |         |
| pop 8  |       |         |         |         |         |         |         |         | ±0.0024 | ±0.0000 | ±0.0003 | ±0.0041 | ±0.0000 | ±0.0000 | ±0.0002 | ±0.0021 | ±0.0019 | ±0.0038 | ±0.0019 | ±0.0000 | ±0.0049 | ±0.0000 | ±0.0032 | ±0.0028 | ±0.0035 | ±0.0048 | ±0.0000 | ±0.0053 | ±0.0043 | ±0.0000 | ±0.0051 | ±0.0000 | ±0.0003 | ±0.0000 | ±0.0002 |         |
| pop 9  |       |         |         |         |         |         |         |         |         | ±0.0004 | ±0.0006 | ±0.0017 | ±0.0026 | ±0.0011 | ±0.0031 | ±0.0029 | ±0.0030 | ±0.0029 | ±0.0011 | ±0.0041 | ±0.0017 | ±0.0018 | ±0.0026 | ±0.0029 | ±0.0029 | ±0.0020 | ±0.0000 | ±0.0049 | ±0.0030 | ±0.0008 | ±0.0020 | ±0.0007 | ±0.0006 | ±0.0004 | ±0.0004 |         |
| pop 10 |       |         |         |         |         |         |         |         |         |         | ±0.0000 | ±0.0006 | ±0.0000 | ±0.0000 | ±0.0000 | ±0.0002 | ±0.0004 | ±0.0020 | ±0.0000 | ±0.0027 | ±0.0045 | ±0.0018 | ±0.0011 | ±0.0021 | ±0.0012 | ±0.0000 | ±0.0040 | ±0.0020 | ±0.0000 | ±0.0036 | ±0.0000 | ±0.0000 | ±0.0000 | ±0.0000 |         |         |
| pop 11 |       |         |         |         |         |         |         |         |         |         |         | ±0.0000 | ±0.0003 | ±0.0000 | ±0.0000 | ±0.0000 | ±0.0000 | ±0.0000 | ±0.0000 | ±0.0000 | ±0.0002 | ±0.0001 | ±0.0000 | ±0.0002 | ±0.0001 | ±0.0000 | ±0.0005 | ±0.0001 | ±0.0000 | ±0.0002 | ±0.0000 | ±0.0000 | ±0.0000 | ±0.0000 |         |         |
| pop 12 |       |         |         |         |         |         |         |         |         |         |         |         | ±0.0036 | ±0.0000 | ±0.0048 | ±0.0043 | ±0.0032 | ±0.0029 | ±0.0037 | ±0.0048 | ±0.0050 | ±0.0046 | ±0.0000 | ±0.0036 | ±0.0029 | ±0.0022 | ±0.0000 | ±0.0044 | ±0.0044 | ±0.0010 | ±0.0033 | ±0.0009 | ±0.0002 | ±0.0000 | ±0.0001 |         |
| pop 13 |       |         |         |         |         |         |         |         |         |         |         |         |         | ±0.0001 | ±0.0000 | ±0.0022 | ±0.0020 | ±0.0038 | ±0.0021 | ±0.0000 | ±0.0049 | ±0.0000 | ±0.0031 | ±0.0024 | ±0.0041 | ±0.0054 | ±0.0001 | ±0.0044 | ±0.0036 | ±0.0000 | ±0.0050 | ±0.0000 | ±0.0004 | ±0.0000 |         |         |
| pop 14 |       |         |         |         |         |         |         |         |         |         |         |         |         |         | ±0.0000 | ±0.0000 | ±0.0000 | ±0.0000 | ±0.0003 | ±0.0000 | ±0.0000 | ±0.0000 | ±0.0000 | ±0.0000 | ±0.0000 | ±0.0000 | ±0.0001 | ±0.0000 | ±0.0000 | ±0.0000 | ±0.0000 | ±0.0000 | ±0.0000 | ±0.0000 |         |         |
| pop 15 |       |         |         |         |         |         |         |         |         |         |         |         |         |         |         | ±0.0050 | ±0.0026 | ±0.0000 | ±0.0029 | ±0.0000 | ±0.0047 | ±0.0000 | ±0.0052 | ±0.0039 | ±0.0000 | ±0.0046 | ±0.0001 | ±0.0051 | ±0.0057 | ±0.0000 | ±0.0000 | ±0.0000 | ±0.0008 | ±0.0000 |         |         |
| pop 16 |       |         |         |         |         |         |         |         |         |         |         |         |         |         |         |         | ±0.0050 | ±0.0044 | ±0.0046 | ±0.0022 | ±0.0023 | ±0.0048 | ±0.0049 | ±0.0049 | ±0.0016 | ±0.0000 | ±0.0045 | ±0.0049 | ±0.0003 | ±0.0052 | ±0.0002 | ±0.0007 | ±0.0001 | ±0.0001 |         |         |
| pop 17 |       |         |         |         |         |         |         |         |         |         |         |         |         |         |         |         |         | ±0.0048 | ±0.0046 | ±0.0051 | ±0.0017 | ±0.0025 | ±0.0041 | ±0.0043 | ±0.0012 | ±0.0001 | ±0.0047 | ±0.0045 | ±0.0006 | ±0.0025 | ±0.0005 | ±0.0042 | ±0.0000 | ±0.0000 |         |         |
| pop 18 |       |         |         |         |         |         |         |         |         |         |         |         |         |         |         |         |         |         | ±0.0044 | ±0.0000 | ±0.0046 | ±0.0051 | ±0.0000 | ±0.0000 | ±0.0045 | ±0.0001 | ±0.0000 | ±0.0036 | ±0.0025 | ±0.0040 | ±0.0024 | ±0.0015 | ±0.0001 | ±0.0001 |         |         |
| pop 19 |       |         |         |         |         |         |         |         |         |         |         |         |         |         |         |         |         |         |         | ±0.0042 | ±0.0035 | ±0.0018 | ±0.0035 | ±0.0053 | ±0.0047 | ±0.0011 | ±0.0000 | ±0.0051 | ±0.0051 | ±0.0001 | ±0.0037 | ±0.0000 | ±0.0033 | ±0.0000 |         |         |
| pop 20 |       |         |         |         |         |         |         |         |         |         |         |         |         |         |         |         |         |         |         |         | ±0.0041 | ±0.0000 | ±0.0055 | ±0.0045 | ±0.0000 | ±0.0044 | ±0.0001 | ±0.0000 | ±0.0043 | ±0.0000 | ±0.0000 | ±0.0000 | ±0.0019 | ±0.0005 |         |         |
| pop 21 |       |         |         |         |         |         |         |         |         |         |         |         |         |         |         |         |         |         |         |         |         | ±0.0045 | ±0.0034 | ±0.0052 | ±0.0042 | ±0.0031 | ±0.0000 | ±0.0000 | ±0.0000 | ±0.0033 | ±0.0047 | ±0.0030 | ±0.0010 | ±0.0000 |         |         |
| pop 22 |       |         |         |         |         |         |         |         |         |         |         |         |         |         |         |         |         |         |         |         |         |         | ±0.0044 | ±0.0055 | ±0.0041 | ±0.0038 | ±0.0000 | ±0.0046 | ±0.0038 | ±0.0047 | ±0.0046 | ±0.0039 | ±0.0002 | ±0.0000 |         |         |
| pop 23 |       |         |         |         |         |         |         |         |         |         |         |         |         |         |         |         |         |         |         |         |         |         |         | ±0.0044 | ±0.0044 | ±0.0047 | ±0.0032 | ±0.0000 | ±0.0048 | ±0.0028 | ±0.0023 | ±0.0046 | ±0.0021 | ±0.0004 | ±0.0005 |         |
| pop 24 |       |         |         |         |         |         |         |         |         |         |         |         |         |         |         |         |         |         |         |         |         |         |         |         | ±0.0000 | ±0.0021 | ±0.0000 | ±0.0036 | ±0.0037 | ±0.0015 | ±0.0028 | ±0.0012 | ±0.0014 | ±0.0000 | ±0.0001 |         |
| pop 25 |       |         |         |         |         |         |         |         |         |         |         |         |         |         |         |         |         |         |         |         |         |         |         |         |         | ±0.0052 | ±0.0000 | ±0.0000 | ±0.0038 | ±0.0025 | ±0.0041 | ±0.0022 | ±0.0015 | ±0.0001 | ±0.0002 |         |
| pop 26 |       |         |         |         |         |         |         |         |         |         |         |         |         |         |         |         |         |         |         |         |         |         |         |         |         |         | ±0.0003 | ±0.0047 | ±0.0039 | ±0.0015 | ±0.0029 | ±0.0014 | ±0.0002 | ±0.0000 | ±0.0002 |         |
| pop 27 |       |         |         |         |         |         |         |         |         |         |         |         |         |         |         |         |         |         |         |         |         |         |         |         |         |         |         | ±0.0000 | ±0.0000 | ±0.0000 | ±0.0013 | ±0.0000 | ±0.0000 | ±0.0000 | ±0.0001 |         |
| pop 28 |       |         |         |         |         |         |         |         |         |         |         |         |         |         |         |         |         |         |         |         |         |         |         |         |         |         |         | ±0.0000 | ±0.0040 | ±0.0000 | ±0.0042 | ±0.0027 | ±0.0003 | ±0.0004 | ±0.0001 |         |
| pop 29 |       |         |         |         |         |         |         |         |         |         |         |         |         |         |         |         |         |         |         |         |         |         |         |         |         |         |         | ±0.0027 | ±0.0041 | ±0.0024 | ±0.0031 | ±0.0000 | ±0.0000 | ±0.0001 | ±0.0001 |         |
| pop 30 |       |         |         |         |         |         |         |         |         |         |         |         |         |         |         |         |         |         |         |         |         |         |         |         |         |         |         |         | ±0.0052 | ±0.0000 | ±0.0000 | ±0.0000 | ±0.0000 | ±0.0000 | ±0.0000 |         |
| pop 31 |       |         |         |         |         |         |         |         |         |         |         |         |         |         |         |         |         |         |         |         |         |         |         |         |         |         |         |         |         | ±0.0044 | ±0.0000 | ±0.0000 | ±0.0000 | ±0.0000 | ±0.0000 |         |
| pop 32 |       |         |         |         |         |         |         |         |         |         |         |         |         |         |         |         |         |         |         |         |         |         |         |         |         |         |         |         |         |         | ±0.0000 | ±0.0000 | ±0.0000 | ±0.0000 | ±0.0000 |         |
| pop 33 |       |         |         |         |         |         |         |         |         |         |         |         |         |         |         |         |         |         |         |         |         |         |         |         |         |         |         |         |         |         |         | ±0.0000 | ±0.0000 | ±0.0000 | ±0.0000 |         |
| pop 34 |       |         |         |         |         |         |         |         |         |         |         |         |         |         |         |         |         |         |         |         |         |         |         |         |         |         |         |         |         |         |         |         | ±0.0000 | ±0.0000 | ±0.0000 | ±0.0000 |
