# Supplementary material for: Molecular Genetics Reveal That Silvatic Rhodnius prolixus Do Colonise Rural Houses
Source: PubMed Central journal article supplement (PMC2270345; doi:10.1371/journal.pntd.0000210), 2008-04-02
Supplement: pntd.0000210.s002.pdf [file pntd.0000210.s002.pdf]

Table S2. Summary of population microsatellite data

(A) Summary of population microsatellite data per locus (LIST14-056, LIST14-017, LIST14-042, LIST14-010, LIST14-064)

| Pop | LIST14-056 |                |                |                |              |                 | LIST14-017     |                |                |                   |                 | LIST14-042     |                |                |      |                 | LIST14-010     |                |                |               |                 | LIST14-064     |                |                |                   |                 |
|-----|------------|----------------|----------------|----------------|--------------|-----------------|----------------|----------------|----------------|-------------------|-----------------|----------------|----------------|----------------|------|-----------------|----------------|----------------|----------------|---------------|-----------------|----------------|----------------|----------------|-------------------|-----------------|
|     | N          | N <sub>A</sub> | H <sub>O</sub> | H <sub>E</sub> | P            | F <sub>IS</sub> | N <sub>A</sub> | H <sub>O</sub> | H <sub>E</sub> | P                 | F <sub>IS</sub> | N <sub>A</sub> | H <sub>O</sub> | H <sub>E</sub> | P    | F <sub>IS</sub> | N <sub>A</sub> | H <sub>O</sub> | H <sub>E</sub> | P             | F <sub>IS</sub> | N <sub>A</sub> | H <sub>O</sub> | H <sub>E</sub> | P                 | F <sub>IS</sub> |
| 1   | 26         | 5              | 0.39           | 0.47           | 0.31         | +0.17           | 4              | <b>0.35</b>    | <b>0.67</b>    | <b>0.004</b>      | +0.47           | 2              | 0.27           | 0.34           | 0.29 | +0.21           | 2              | 0.08           | 0.19           | 0.12          | +0.47           | 2              | 0.19           | 0.27           | 0.37              | +0.19           |
| 2   | 18         | 6              | 0.50           | 0.61           | 0.41         | +0.12           | 3              | <b>0.33</b>    | <b>0.70</b>    | <b>0.02</b>       | +0.51           | 2              | 0.56           | 0.51           | 1    | -0.08           | 3              | 0.22           | 0.35           | 0.20          | +0.26           | 2              | <b>0.06</b>    | <b>0.30</b>    | <b>0.01</b>       | +0.78           |
| 3   | 26         | 4              | 0.60           | 0.54           | 0.76         | -0.11           | 3              | 0.16           | 0.4            | <b>0.001</b>      | +0.62           | 2              | 0.08           | 0.11           | 1    | -0.02           | 2              | 0.04           | 0.08           | 1             | -               | 2              | <b>0.04</b>    | <b>0.49</b>    | <b>&lt;0.0001</b> | +0.92           |
| 4   | 10         | 3              | 0.50           | 0.50           | 1            | -0.18           | 3              | 0.40           | 0.79           | 0.20              | +0.44           | 2              | 0.10           | 0.35           | 0.16 | +0.64           | 4              | 0.40           | 0.36           | 1             | -0.11           | 2              | 0.63           | 0.53           | 1                 | -0.21           |
| 5   | 39         | 7              | 0.68           | 0.68           | 0.59         | -0.00           | 4              | <b>0.26</b>    | <b>0.67</b>    | <b>&lt;0.0001</b> | +0.61           | 2              | 0.56           | 0.54           | 0.54 | -0.12           | 2              | 0.16           | 0.20           | 1             | -0.07           | 3              | 0.31           | 0.43           | 0.31              | +0.22           |
| 6   | 24         | 2              | 0.42           | 0.38           | 1            | -0.09           | 3              | <b>0.17</b>    | <b>0.30</b>    | <b>0.006</b>      | +0.38           | 2              | 0.50           | 0.50           | 1    | -0.05           | 5              | 0.63           | 0.66           | 0.75          | +0.01           | 1              | M              | M              | M                 | M               |
| 7   | 12         | 5              | 0.67           | 0.67           | 1            | -0.05           | 3              | 0.17           | 0.53           | 0.01              | +0.64           | 2              | 0.75           | 0.52           | 0.24 | -0.48           | 4              | 0.50           | 0.51           | 0.12          | +0.02           | 2              | 0.00           | 0.26           | 0.05              | +1              |
| 8   | 15         | 6              | 0.53           | 0.55           | 0.50         | +0.03           | 3              | 0.33           | 0.60           | 0.17              | +0.39           | 2              | 0.27           | 0.56           | 0.11 | +0.47           | 2              | 0.13           | 0.19           | 1             | -0.04           | 2              | 0.20           | 0.35           | 0.33              | +0.31           |
| 9a  | 14         | 3              | 0.14           | 0.27           | 0.08         | +0.47           | 4              | <b>0.29</b>    | <b>0.74</b>    | <b>0.001</b>      | +0.60           | 2              | 0.5            | 0.50           | 1    | -0.01           | 1              | M              | M              | M             | M               | 1              | M              | M              | M                 | M               |
| 9b  | 14         | 3              | 0.21           | 0.37           | 0.37         | +0.33           | 4              | <b>0.36</b>    | <b>0.71</b>    | <b>0.006</b>      | +0.50           | 2              | 0.21           | 0.52           | 0.07 | +0.54           | 1              | M              | M              | M             | M               | 1              | M              | M              | M                 | M               |
| 10  | 13         | 3              | <b>0.77</b>    | <b>0.62</b>    | <b>0.004</b> | -0.35           | 2              | 0.08           | 0.15           | 1                 | -               | 1              | M              | M              | M    | M               | 1              | M              | M              | M             | M               | 1              | M              | M              | M                 | M               |
| 13  | 11         | 3              | 0.64           | 0.54           | 0.63         | -0.35           | 3              | 0.82           | 0.66           | 0.85              | -0.25           | 2              | 0.36           | 0.52           | 0.54 | +0.26           | 1              | M              | M              | M             | M               | 2              | 0.18           | 0.26           | 1                 | -0.05           |
| 16  | 11         | 3              | 0.36           | 0.39           | 1            | -0.13           | 3              | 0.27           | 0.53           | 0.14              | +0.41           | 2              | 0.36           | 0.54           | 0.53 | +0.26           | 2              | 0.20           | 0.28           | 1             | -0.06           | 3              | 0.46           | 0.46           | 0.60              | +0.00           |
| 17  | 10         | 4              | 0.80           | 0.64           | 0.55         | -0.26           | 3              | 0.50           | 0.64           | 0.09              | +0.22           | 2              | 0.60           | 0.51           | 1    | -0.20           | 4              | 0.22           | 0.41           | 0.12          | +0.46           | 4              | 0.40           | 0.62           | 0.38              | +0.29           |
| 18  | 24         | 8              | 0.88           | 0.79           | 0.85         | -0.11           | 5              | 0.38           | 0.58           | 0.02              | +0.35           | 2              | 0.42           | 0.52           | 0.67 | +0.16           | 7              | 0.38           | 0.46           | 0.04          | +0.14           | 4              | 0.42           | 0.54           | 0.06              | +0.23           |
| 19  | 11         | 5              | 0.64           | 0.72           | 0.29         | +0.05           | 4              | 0.45           | 0.71           | 0.33              | +0.30           | 2              | 0.45           | 0.54           | 1    | +0.00           | 2              | 0.10           | 0.19           | 1             | -               | 4              | 0.27           | 0.54           | 0.013             | +0.49           |
| 20  | 20         | 8              | 0.85           | 0.75           | 0.21         | -0.14           | 4              | 0.35           | 0.67           | 0.01              | +0.47           | 3              | 0.55           | 0.55           | 1    | -0.06           | 4              | 0.25           | 0.36           | 0.04          | +0.21           | 4              | 0.65           | 0.64           | 0.66              | -0.02           |
| 21  | 16         | 3              | 0.81           | 0.69           | 0.20         | -0.19           | 3              | 0.31           | 0.59           | 0.03              | +0.45           | 2              | 0.63           | 0.51           | 0.61 | -0.24           | 6              | 0.50           | 0.56           | 0.21          | +0.04           | 3              | 0.38           | 0.50           | 0.02              | +0.19           |
| 22  | 13         | 4              | 0.62           | 0.76           | 0.48         | +0.13           | 3              | 0.27           | 0.58           | 0.04              | +0.55           | 2              | 0.62           | 0.49           | 0.57 | -0.26           | 4              | 0.42           | 0.44           | 1             | -0.13           | 3              | 0.39           | 0.40           | 1                 | -0.13           |
| 23  | 17         | 5              | 0.77           | 0.72           | 0.80         | -0.07           | 4              | 0.41           | 0.64           | 0.10              | +0.30           | 2              | 0.69           | 0.50           | 0.16 | -0.40           | 6              | 0.44           | 0.48           | 0.33          | -0.01           | 4              | 0.31           | 0.52           | 0.08              | +0.34           |
| 24a | 11         | 3              | 0.36           | 0.65           | 0.08         | +0.39           | 4              | 0.46           | 0.72           | 0.20              | +0.34           | 3              | 0.36           | 0.50           | 0.60 | +0.18           | 2              | 0.09           | 0.18           | 1             | -               | 3              | <b>0.18</b>    | <b>0.65</b>    | <b>0.003</b>      | <b>+0.69</b>    |
| 24b | 12         | 3              | 0.58           | 0.57           | 1            | -0.03           | 4              | 0.33           | 0.63           | 0.03              | +0.48           | 2              | 0.58           | 0.52           | 1    | -0.13           | 4              | 0.33           | 0.50           | 0.56          | +0.22           | 5              | 0.50           | 0.44           | 1                 | -0.16           |
| 24c | 12         | 4              | 0.42           | 0.66           | 0.19         | +0.33           | 3              | <b>0.18</b>    | <b>0.66</b>    | <b>0.003</b>      | +0.70           | 3              | 0.42           | 0.55           | 0.55 | +0.26           | 4              | 0.42           | 0.42           | 0.39          | +0.02           | 3              | 0.33           | 0.37           | 1                 | -0.11           |
| 24d | 11         | 5              | 0.73           | 0.74           | 0.32         | +0.02           | 3              | 0.46           | 0.57           | 0.07              | +0.21           | 2              | 0.45           | 0.46           | 1    | +0.00           | 4              | <b>0.09</b>    | <b>0.41</b>    | <b>0.002</b>  | +0.74           | 3              | 0.36           | 0.62           | 0.02              | +0.36           |
| 25  | 13         | 5              | 0.52           | 0.59           | 0.48         | +0.02           | 4              | 0.31           | 0.66           | 0.01              | +0.52           | 2              | 0.42           | 0.60           | 0.59 | +0.20           | 2              | 0.25           | 0.41           | 0.41          | +0.28           | 4              | 0.46           | 0.58           | 0.64              | +0.21           |
| 26  | 13         | 4              | 0.62           | 0.69           | 0.67         | +0.11           | 3              | 0.08           | 0.29           | 0.04              | +0.66           | 2              | 0.23           | 0.58           | 0.08 | +0.56           | 2              | 0.08           | 0.15           | 1             | -               | 2              | 0.54           | 0.55           | 1                 | -0.06           |
| 27  | 17         | 5              | <b>0.94</b>    | <b>0.77</b>    | <b>0.006</b> | -0.23           | 2              | 0.31           | 0.47           | 0.27              | +0.34           | 2              | 0.24           | 0.47           | 0.09 | +0.46           | 4              | <b>0.50</b>    | <b>0.68</b>    | <b>0.0003</b> | +0.24           | 2              | 0.13           | 0.18           | 1                 | -0.03           |
| 28  | 10         | 6              | 0.70           | 0.85           | 1            | +0.13           | 4              | 0.30           | 0.73           | 0.02              | +0.59           | 3              | 0.44           | 0.67           | 0.72 | +0.30           | 4              | 0.33           | 0.56           | 0.14          | +0.31           | 5              | 0.60           | 0.63           | 0.80              | -0.06           |
| 29  | 24         | 4              | 0.35           | 0.44           | 0.27         | +0.20           | 4              | <b>0.29</b>    | <b>0.77</b>    | <b>&lt;0.0001</b> | +0.62           | 2              | 0.67           | 0.50           | 0.11 | -0.35           | 4              | 0.58           | 0.57           | 0.28          | -0.07           | 2              | 0.50           | 0.48           | 1                 | -0.05           |
| 30  | 24         | 2              | 0.25           | 0.37           | 0.23         | +0.26           | 3              | <b>0.33</b>    | <b>0.65</b>    | <b>0.0007</b>     | +0.46           | 2              | 0.33           | 0.45           | 0.34 | +0.21           | 2              | 0.08           | 0.12           | 1             | -0.02           | 2              | 0.33           | 0.34           | 1                 | +0.01           |
| 31  | 17         | 2              | 0.42           | 0.44           | 1            | -0.03           | 3              | 0.41           | 0.52           | 0.05              | +0.15           | 2              | 0.18           | 0.49           | 0.02 | +0.62           | 3              | 0.19           | 0.24           | 1             | -0.05           | 2              | 0.18           | 0.46           | 0.04              | +0.57           |
| 34  | 26         | 3              | 0.27           | 0.32           | 0.10         | +0.17           | 3              | <b>0.31</b>    | <b>0.53</b>    | <b>0.006</b>      | +0.40           | 2              | 0.15           | 0.18           | 1    | -0.06           | 4              | 0.35           | 0.45           | 0.02          | +0.18           | 3              | 0.04           | 0.15           | 0.02              | +0.66           |
| 35  | 21         | 6              | 0.52           | 0.57           | 0.69         | +0.04           | 3              | <b>0.19</b>    | <b>0.65</b>    | <b>&lt;0.0001</b> | +0.69           | 2              | 0.43           | 0.51           | 0.66 | +0.16           | 4              | 0.33           | 0.34           | 1             | -0.11           | 2              | 0.38           | 0.45           | 1                 | +0.09           |

N= number of specimens amplified, N<sub>A</sub>= number of alleles, H<sub>O</sub>, H<sub>E</sub>=Observed and Expected heterozygosity, P=exact probability for expected Hardy Weinberg equilibrium conditions for each locus/population combination (Arlequin v2.1), M= monomorphic. F<sub>IS</sub>= Weir & Cockerham (1984) (GENEPOP v3.4). **Values in bold** departures from HWE significant after Bonferroni correction (populations analysed at 9 loci k=9, p1=0.05/9, at 10 loci k=10, p1=0.05/10). See Table 2 for population details

(B) Summary of population microsatellite data per locus (LIST14-013, LIST14-021, LIST14-025, LIST14-037, LIST14-079).

|     | LIST14-013     |                |                |              |                 | LIST14-021     |                |                |               |                 | LIST14-025     |                |                |      |                 | LIST14-037     |                |                |      |                 | LIST14-079 ^   |                |                |      |                 |
|-----|----------------|----------------|----------------|--------------|-----------------|----------------|----------------|----------------|---------------|-----------------|----------------|----------------|----------------|------|-----------------|----------------|----------------|----------------|------|-----------------|----------------|----------------|----------------|------|-----------------|
| Pop | N <sub>A</sub> | H <sub>O</sub> | H <sub>E</sub> | P            | F <sub>IS</sub> | N <sub>A</sub> | H <sub>O</sub> | H <sub>E</sub> | P             | F <sub>IS</sub> | N <sub>A</sub> | H <sub>O</sub> | H <sub>E</sub> | P    | F <sub>IS</sub> | N <sub>A</sub> | H <sub>O</sub> | H <sub>E</sub> | P    | F <sub>IS</sub> | N <sub>A</sub> | H <sub>O</sub> | H <sub>E</sub> | P    | F <sub>IS</sub> |
| 1   | 2              | 0.48           | 0.53           | 1.00         | +0.06           | 2              | 0.15           | 0.35           | 0.03          | +0.52           | 2              | 0.42           | 0.38           | 1    | -0.11           | 2              | 0.48           | 0.50           | 1    | -0.02           | NA             | -              | -              | -    | -               |
| 2   | 2              | 0.65           | 0.54           | 0.36         | -0.27           | 2              | 0.06           | 0.11           | 1             | -               | 2              | 0.39           | 0.37           | 1    | -0.21           | 2              | 0.44           | 0.40           | 0.53 | -0.26           | NA             | -              | -              | -    | -               |
| 3   | 2              | 0.38           | 0.36           | 1            | -0.06           | 2              | 0.12           | 0.15           | 1             | -0.04           | 2              | 0.19           | 0.24           | 0.37 | +0.19           | 2              | 0.38           | 0.50           | 0.42 | +0.23           | NA             | -              | -              | -    | -               |
| 4   | 2              | 0.50           | 0.48           | 1            | -0.05           | 3              | 0.10           | 0.37           | 0.06          | +0.65           | 2              | 0.50           | 0.48           | 1    | -0.05           | 2              | 0.70           | 0.56           | 0.52 | -0.37           | NA             | -              | -              | -    | -               |
| 5   | 2              | 0.54           | 0.53           | 0.74         | -0.09           | 2              | 0.08           | 0.12           | 1             | -0.03           | 3              | 0.56           | 0.51           | 0.88 | -0.10           | 2              | 0.45           | 0.41           | 0.69 | -0.11           | NA             | -              | -              | -    | -               |
| 6   | 2              | 0.50           | 0.51           | 1            | +0.02           | 3              | 0.13           | 0.17           | 1             | -0.03           | 2              | 0.13           | 0.16           | 1    | -0.05           | 3              | 0.38           | 0.52           | 0.33 | +0.24           | 3              | 0.37           | 0.32           | 1    | -0.18           |
| 7   | 2              | 0.67           | 0.51           | 0.55         | -0.33           | 3              | 0.50           | 0.51           | 0.02          | +0.02           | 2              | 0.17           | 0.24           | 1    | -0.05           | 4              | 0.42           | 0.37           | 1    | -0.12           | 2              | 0.17           | 0.24           | 1    | -0.05           |
| 8   | 2              | 0.33           | 0.50           | 0.54         | +0.24           | 1              | M              | M              | M             | M               | 3              | 0.27           | 0.41           | 0.45 | +0.23           | 2              | 0.53           | 0.50           | 1    | -0.17           | NA             | -              | -              | -    | -               |
| 9a  | 2              | 0.71           | 0.55           | 0.27         | -0.43           | 4              | 0.64           | 0.70           | 0.59          | +0.07           | 3              | 0.43           | 0.36           | 1    | -0.19           | 2              | 0.46           | 0.49           | 1    | +0.07           | NA             | -              | -              | -    | -               |
| 9b  | 2              | 0.36           | 0.52           | 0.32         | +0.32           | 4              | <b>0.21</b>    | <b>0.77</b>    | <b>0.0004</b> | +0.71           | 3              | 0.42           | 0.42           | 1    | -0.17           | 2              | 0.69           | 0.51           | 0.28 | -0.39           | NA             | -              | -              | -    | -               |
| 10  | 2              | 0.23           | 0.48           | 0.16         | +0.45           | 2              | 0.38           | 0.52           | 0.58          | +0.19           | 2              | 0.23           | 0.21           | 1    | -0.09           | 2              | 0.38           | 0.58           | 0.57 | +0.25           | NA             | -              | -              | -    | -               |
| 13  | 2              | 0.46           | 0.54           | 1            | +0.11           | 1              | M              | M              | M             | M               | 3              | 0.27           | 0.56           | 0.02 | +0.46           | 2              | 0.27           | 0.33           | 1    | -0.11           | NA             | -              | -              | -    | -               |
| 16  | 4              | 0.82           | 0.71           | 0.33         | -0.15           | 3              | 0.55           | 0.56           | 1             | +0.02           | 2              | 0.45           | 0.37           | 1    | -0.25           | 3              | 0.45           | 0.65           | 0.75 | +0.26           | 3              | 0.46           | 0.71           | 0.28 | +0.29           |
| 17  | 3              | 0.50           | 0.55           | 1            | +0.06           | 3              | <b>0.20</b>    | <b>0.55</b>    | <b>0.003</b>  | +0.60           | 2              | 0.40           | 0.44           | 1    | +0.10           | 3              | 0.70           | 0.56           | 0.74 | -0.26           | 3              | 0.5            | 0.68           | 0.08 | +0.17           |
| 18  | 5              | 0.46           | 0.64           | 0.05         | +0.25           | 3              | 0.58           | 0.63           | 0.41          | +0.07           | 3              | 0.52           | 0.62           | 0.61 | +0.11           | 3              | 0.67           | 0.55           | 0.20 | -0.27           | 6              | 0.5            | 0.49           | 0.90 | -0.09           |
| 19  | 3              | 0.46           | 0.60           | 0.28         | +0.25           | 3              | 0.09           | 0.40           | 0.01          | +0.77           | 3              | 0.55           | 0.45           | 1    | -0.22           | 4              | 0.73           | 0.68           | 1    | -0.08           | 3              | 0.64           | 0.48           | 0.64 | -0.35           |
| 20  | 4              | 0.50           | 0.60           | 0.47         | +0.18           | 3              | 0.40           | 0.38           | 1             | -0.19           | 2              | 0.58           | 0.54           | 0.66 | -0.15           | 4              | 0.67           | 0.57           | 0.7  | -0.18           | 4              | 0.4            | 0.43           | 0.32 | -0.03           |
| 21  | 4              | 0.69           | 0.56           | 0.16         | -0.23           | 3              | 0.50           | 0.59           | 0.15          | +0.15           | 3              | 0.75           | 0.59           | 0.20 | -0.36           | 4              | 0.56           | 0.54           | 0.05 | -0.07           | 5              | 0.75           | 0.61           | 0.72 | -0.23           |
| 22  | 2              | 0.46           | 0.44           | 1            | -0.04           | 2              | 0.08           | 0.15           | -             | -               | 2              | 0.69           | 0.47           | 0.21 | -0.50           | 2              | 0.46           | 0.49           | 1    | +0.07           | 3              | 0.33           | 0.37           | 1    | -0.11           |
| 23  | 4              | 0.59           | 0.68           | 0.06         | +0.07           | 3              | 0.47           | 0.53           | 0.36          | +0.10           | 4              | 0.65           | 0.59           | 0.90 | -0.09           | 4              | 0.53           | 0.57           | 0.60 | +0.07           | 7              | 0.59           | 0.66           | 0.62 | +0.11           |
| 24a | 2              | 0.55           | 0.52           | 1            | -0.05           | 3              | 0.36           | 0.56           | 0.25          | +0.28           | 3              | 0.73           | 0.58           | 0.78 | -0.26           | 3              | 0.64           | 0.57           | 1    | -0.13           | 5              | 0.36           | 0.62           | 0.07 | +0.37           |
| 24b | 3              | 0.46           | 0.59           | 0.75         | +0.16           | 3              | 0.17           | 0.51           | 0.01          | +0.67           | 4              | 0.58           | 0.66           | 0.77 | +0.12           | 3              | 0.58           | 0.56           | 1    | -0.04           | 3              | 0.33           | 0.51           | 0.20 | +0.35           |
| 24c | 5              | 0.58           | 0.70           | 0.85         | +0.09           | 3              | 0.75           | 0.56           | 0.41          | -0.36           | 3              | 0.67           | 0.50           | 0.64 | -0.39           | 2              | 0.50           | 0.55           | 1    | +0.02           | 4              | 0.42           | 0.66           | 0.28 | +0.30           |
| 24d | 3              | 0.55           | 0.50           | 1            | -0.26           | 3              | 0.73           | 0.54           | 0.35          | -0.38           | 3              | 0.46           | 0.46           | 1    | -0.16           | 3              | 0.89           | 0.58           | 0.08 | -0.58           | 5              | 0.45           | 0.67           | 0.12 | +0.27           |
| 25  | 3              | 0.54           | 0.54           | 1            | +0.01           | 3              | 0.39           | 0.45           | 0.52          | +0.02           | 4              | 0.75           | 0.58           | 0.88 | -0.30           | 4              | 0.67           | 0.62           | 0.84 | -0.14           | 4              | 0.69           | 0.71           | 0.66 | -0.03           |
| 26  | 2              | 0.46           | 0.37           | 1            | -0.26           | 3              | 0.69           | 0.66           | 0.89          | -0.06           | 4              | 0.39           | 0.44           | 0.68 | +0.14           | 2              | 0.38           | 0.39           | 1    | -0.20           | 3              | 0.54           | 0.66           | 0.57 | +0.19           |
| 27  | 2              | <b>0.88</b>    | <b>0.51</b>    | <b>0.003</b> | -0.78           | 3              | 0.47           | 0.59           | 0.77          | +0.12           | 3              | 0.47           | 0.52           | 1    | +0.10           | 3              | 0.59           | 0.58           | 0.52 | -0.01           | 4              | 0.35           | 0.36           | 1    | -0.12           |
| 28  | 4              | 0.70           | 0.54           | 0.74         | -0.33           | 2              | 0.60           | 0.56           | 1             | -0.20           | 3              | 0.60           | 0.65           | 0.73 | -0.07           | 2              | 0.60           | 0.57           | 1    | -0.15           | 3              | 0.30           | 0.42           | 0.48 | +0.29           |
| 29  | 3              | 0.44           | 0.52           | 0.78         | +0.14           | 2              | 0.04           | 0.08           | 1             | -               | 3              | 0.46           | 0.46           | 1    | +0.01           | 4              | 0.48           | 0.48           | 1    | -0.06           | 2              | 0.29           | 0.25           | 1    | -0.15           |
| 30  | 2              | 0.52           | 0.46           | 0.66         | -0.13           | 2              | 0.00           | 0.12           | 0.02          | +1              | 3              | 0.50           | 0.51           | 0.15 | +0.03           | 3              | 0.38           | 0.51           | 0.26 | +0.22           | 1              | M              | M              | M    | M               |
| 31  | 2              | 0.29           | 0.34           | 0.54         | +0.13           | 2              | 0.06           | 0.22           | 0.09          | +0.65           | 2              | 0.06           | 0.12           | 1    | -               | 2              | 0.53           | 0.40           | 0.28 | -0.33           | NA             | -              | -              | -    | -               |
| 34  | 2              | 0.13           | 0.23           | 0.21         | +0.35           | 2              | 0.12           | 0.22           | 0.19          | +0.35           | 4              | 0.08           | 0.15           | 0.05 | +0.32           | 4              | 0.46           | 0.52           | 0.06 | +0.12           | NA             | -              | -              | -    | -               |
| 35  | 2              | 0.50           | 0.43           | 0.62         | -0.17           | 4              | 0.24           | 0.26           | 0.35          | +0.10           | 3              | 0.45           | 0.53           | 0.65 | +0.08           | 2              | 0.43           | 0.35           | 0.53 | -0.25           | NA             | -              | -              | -    | -               |

N= number of specimens amplified, N<sub>A</sub>= number of alleles, H<sub>O</sub>, H<sub>E</sub>=Observed and Expected heterozygosity, P=exact probability for expected Hardy Weinberg equilibrium conditions for each locus/population combination (Arlequin v2.1). F<sub>IS</sub>= Weir & Cockerham (1984) (GENEPOP v3.4). **Values in bold** departures from HWE significant after Bonferroni correction, populations analysed (9 loci k=9, p1=0.05/9, at 10 loci k=10, p1=0.05/10). ^ LIST14-079 amplified in subset of populations. M= monomorphic, NA= not amplified. See Table 2 for population details
